# Supplementary material for: Estimating the COVID-19 infection fatality ratio accounting for seroreversion using statistical modelling
Source: PubMed Central journal article supplement (PMC9120146; doi:10.1038/s43856-022-00106-7), 2022-05-19
Supplement: 43856_2022_106_MOESM3_ESM.pdf [file 43856_2022_106_MOESM3_ESM.pdf]

## Description of Additional Supplementary Files

**File Name:** Supplementary Data 1

**Description:** Age Specific Estimates of the Infection Fatality Ratio across Included Studies: The age-specific IFR estimates are provided with 95% credible intervals (CrI) for models where seroconversion was not and was considered. The crude IFRs and 95% confidence intervals (CI) are included for comparison. In addition, the inferred observed seroprevalence -- from 100 posterior draws based on the posterior probabilities and corrected for test sensitivity and specificity with the Rogan-Gladen equation -- is provided alongside the observed seroprevalence for the latest serosurvey with respect to each study and age group. Ages of "999" indicate an upper bound.
